# Supplementary material
Source: PubMed Central journal article supplement (PMC5915869)
Supplement: NIHMS920089-supplement.pdf [file NIHMS920089-supplement.pdf]

## Supplemental Information

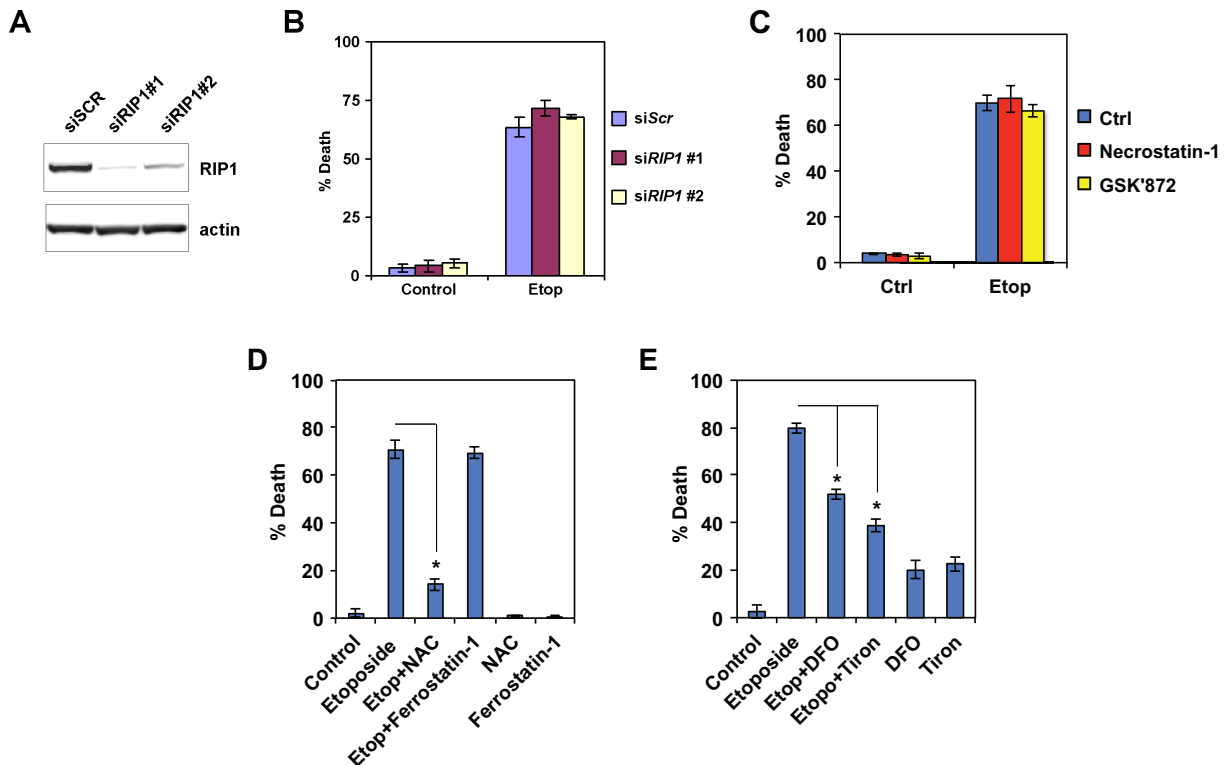

**Supplemental Figure S1. Characterization of DNA damage-induced programmed necrotic death in *Bax*<sup>-/-</sup>*Bak*<sup>-/-</sup> DKO MEFs.** (A) SV40-transformed *Bax*<sup>-/-</sup>*Bak*<sup>-/-</sup> DKO MEFs were transfected with scrambled siRNA (siScr) or siRNA against *RIP1*. Cell lysates were analyzed by immunoblots using the indicated antibodies. (B) Cells described in (A) were treated with etoposide (10  $\mu$ g/ml) for 3 days. (C) SV40-transformed *Bax*<sup>-/-</sup>*Bak*<sup>-/-</sup> DKO MEFs were treated with the indicated agents for 3 days. (D) SV40-transformed *Bax*<sup>-/-</sup>*Bak*<sup>-/-</sup> DKO cells were treated with etoposide, etoposide plus N-acetyl-L-cysteine (NAC, 25 mM), or etoposide plus ferrostatin-1 (10  $\mu$ M) for 3 days. (E) SV40-transformed *Bax*<sup>-/-</sup>*Bak*<sup>-/-</sup> DKO cells were treated with etoposide, etoposide plus deferoxamine (DFO, 80  $\mu$ M), or etoposide plus Tiron (10 mM) for 3 days. Cell death in (B-E) was quantified by flow cytometric analysis following propidium iodide staining (mean  $\pm$  s.d., n = 3 independent experiments). \*  $P < 0.05$ .

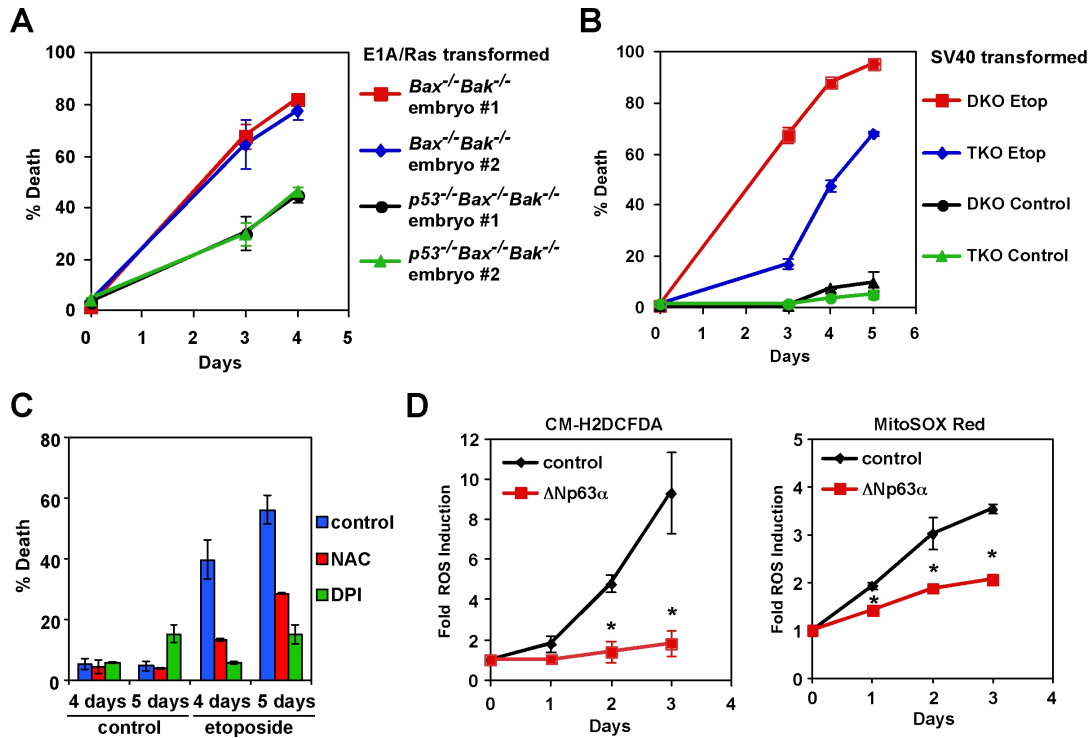

**Supplemental Figure S2. Characterization of DNA damage-induced programmed necrotic death in  $p53^{-/-}Bax^{-/-}Bak^{-/-}$  TKO MEFs.** (A) Primary MEFs isolated from two  $Bax^{-/-}Bak^{-/-}$  embryos and two  $p53^{-/-}Bax^{-/-}Bak^{-/-}$  embryos were transformed by E1A and Ras. E1A/Ras-transformed  $Bax^{-/-}Bak^{-/-}$  and  $p53^{-/-}Bax^{-/-}Bak^{-/-}$  MEFs were treated with etoposide (10  $\mu$ g/ml). Cell death was quantified by annexin-V staining at the indicated times (mean  $\pm$  s.d.,  $n = 3$ ). (B) SV40-transformed  $Bax^{-/-}Bak^{-/-}$  or  $p53^{-/-}Bax^{-/-}Bak^{-/-}$  MEFs were untreated or treated with etoposide. Cell death was quantified by propidium iodide staining at the indicated times (mean  $\pm$  s.d.,  $n = 3$ ). (C) SV40-transformed  $p53^{-/-}Bax^{-/-}Bak^{-/-}$  MEFs were treated with etoposide or etoposide plus N-acetyl-L-cysteine (NAC, 20 mM) or etoposide plus diphenyleneiodonium (DPI, 100 nM) for the indicated times. Cell death was quantified by propidium iodide staining at the indicated times (mean  $\pm$  s.d.,  $n = 3$ ). (D)  $\Delta Np63\alpha$  prevents DNA damage-induced ROS accumulation in  $p53^{-/-}Bax^{-/-}Bak^{-/-}$  MEFs. SV40-transformed  $p53^{-/-}Bax^{-/-}Bak^{-/-}$  MEFs transduced with control or  $\Delta Np63\alpha$ -expressing retrovirus were mock treated or treated with etoposide. Oxidation of the ROS-sensitive dye CM-H<sub>2</sub>DCFDA or MitoSOX Red was quantified by flow cytometric analysis. Data shown are fold increase of ROS after etoposide treatment (mean  $\pm$  s.d.,  $n = 3$ ). \*  $P < 0.05$ .

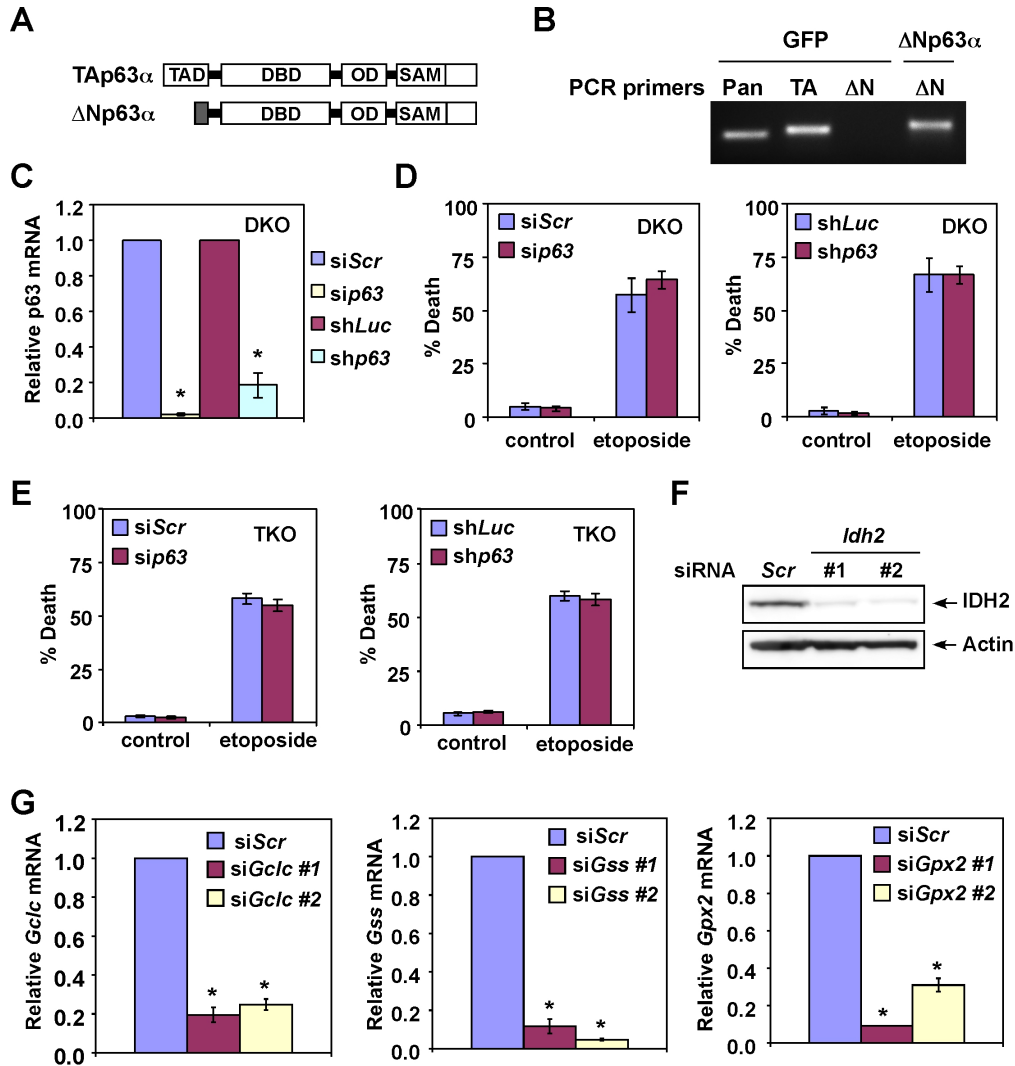

**Supplemental Figure S3. Characterization of p63 isoform expression and validation of knockdown in MEFs.** (A) A schematic of modular structure of the p63 isoforms. (B) cDNA prepared from *Bax*<sup>-/-</sup>*Bak*<sup>-/-</sup> DKO MEFs transduced with GFP or  $\Delta$ Np63 $\alpha$ -expressing retrovirus was subjected to PCR using primers specific for all isoforms of p63 (Pan), TA isoforms of p63 (TA), or  $\Delta$ N isoforms of p63 ( $\Delta$ N). (C) SV40-transformed *Bax*<sup>-/-</sup>*Bak*<sup>-/-</sup> DKO MEFs transduced with retrovirus expressing shRNA against luciferase or p63, or transfected with scrambled siRNA (siScr) or siRNA against p63 were subjected to quantitative RT-PCR analysis for p63 expression. Data presented as mean  $\pm$  SD from three independent experiments. (D) SV40-transformed *Bax*<sup>-/-</sup>*Bak*<sup>-/-</sup> DKO MEFs, transfected with scrambled siRNA (siScr) or siRNA against p63 for 3 days, were mock treated or treated with etoposide (10  $\mu$ g/ml) for 3 days. DKO

MEFs transduced with retrovirus expressing shRNA against luciferase or p63 were mock treated or treated with etoposide for 3 days. Cell death was quantified by propidium iodide staining (mean  $\pm$  s.d., n = 3). (E) SV40-transformed *p53<sup>-/-</sup>Bax<sup>-/-</sup>Bak<sup>-/-</sup>* TKO MEFs, transfected with scrambled siRNA (siScr) or siRNA against p63 for 3 days, were mock treated or treated with etoposide for 5 days. TKO MEFs transduced with retrovirus expressing shRNA against luciferase or p63 were mock treated or treated with etoposide for 5 days. Cell death was quantified by propidium iodide staining (mean  $\pm$  s.d., n = 3). (F) *Bax<sup>-/-</sup>Bak<sup>-/-</sup>* DKO MEFs transfected with scrambled siRNA (siScr) or siRNA against *Idh2* were analyzed by immunoblots using the indicated antibodies. (G) *Bax<sup>-/-</sup>Bak<sup>-/-</sup>* DKO MEFs transfected with scrambled siRNA (siScr) or siRNA against *Gclc*, *Gss*, or *Gpx2* were analyzed by qRT-PCR using the indicated gene-specific primers. Data presented as mean  $\pm$  SD from three independent experiments. \*  $P < 0.05$ .

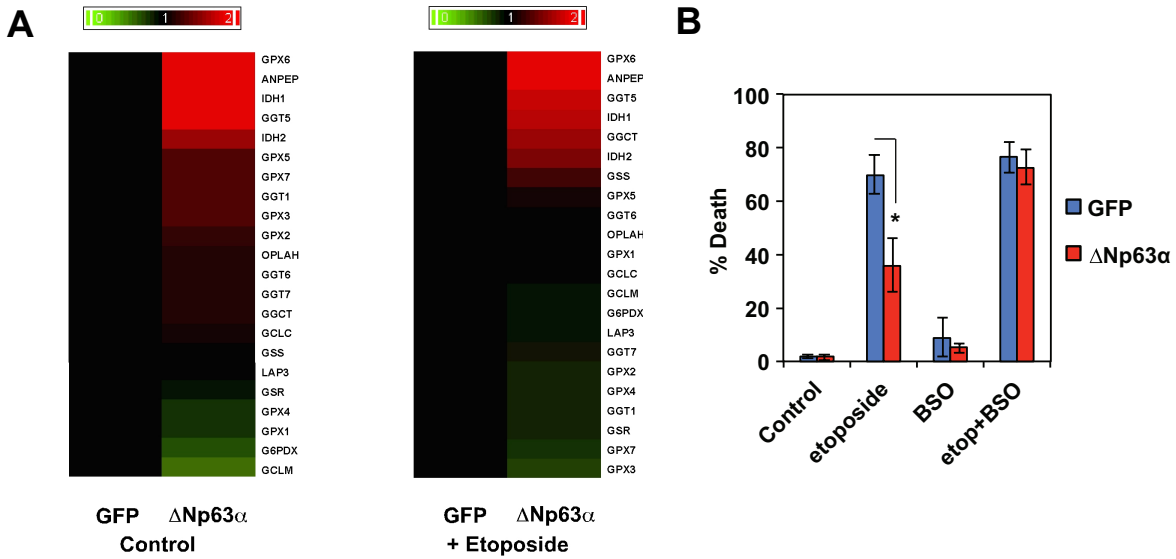

**Supplemental Figure S4.  $\Delta Np63\alpha$  upregulates glutathione metabolic pathway genes and the protective effect of  $\Delta Np63\alpha$  against oxidative stress-induced cell death is mitigated by the GCLC inhibitor buthionine sulfoximine (BSO).** (A) A heatmap representation of glutathione metabolism genes differentially regulated by  $\Delta Np63\alpha$ . *Bax*<sup>-/-</sup>*Bak*<sup>-/-</sup> DKO cells transduced with retrovirus expressing GFP or  $\Delta Np63\alpha$  were mock treated or treated with etoposide (10  $\mu$ g/ml) for 6 hours. The gene expression profiles were assessed using the Affymetrix GeneChip Mouse Gene 1.0 ST array and analyzed for genes involved in glutathione metabolism. (B) SV40-transformed *Bax*<sup>-/-</sup>*Bak*<sup>-/-</sup> DKO MEFs stably expressing GFP or  $\Delta Np63\alpha$  were treated with the indicated agents for 3 days. Cell death was quantified by propidium iodide staining (mean  $\pm$  s.d., n = 3 independent experiments). \*  $P < 0.05$ .

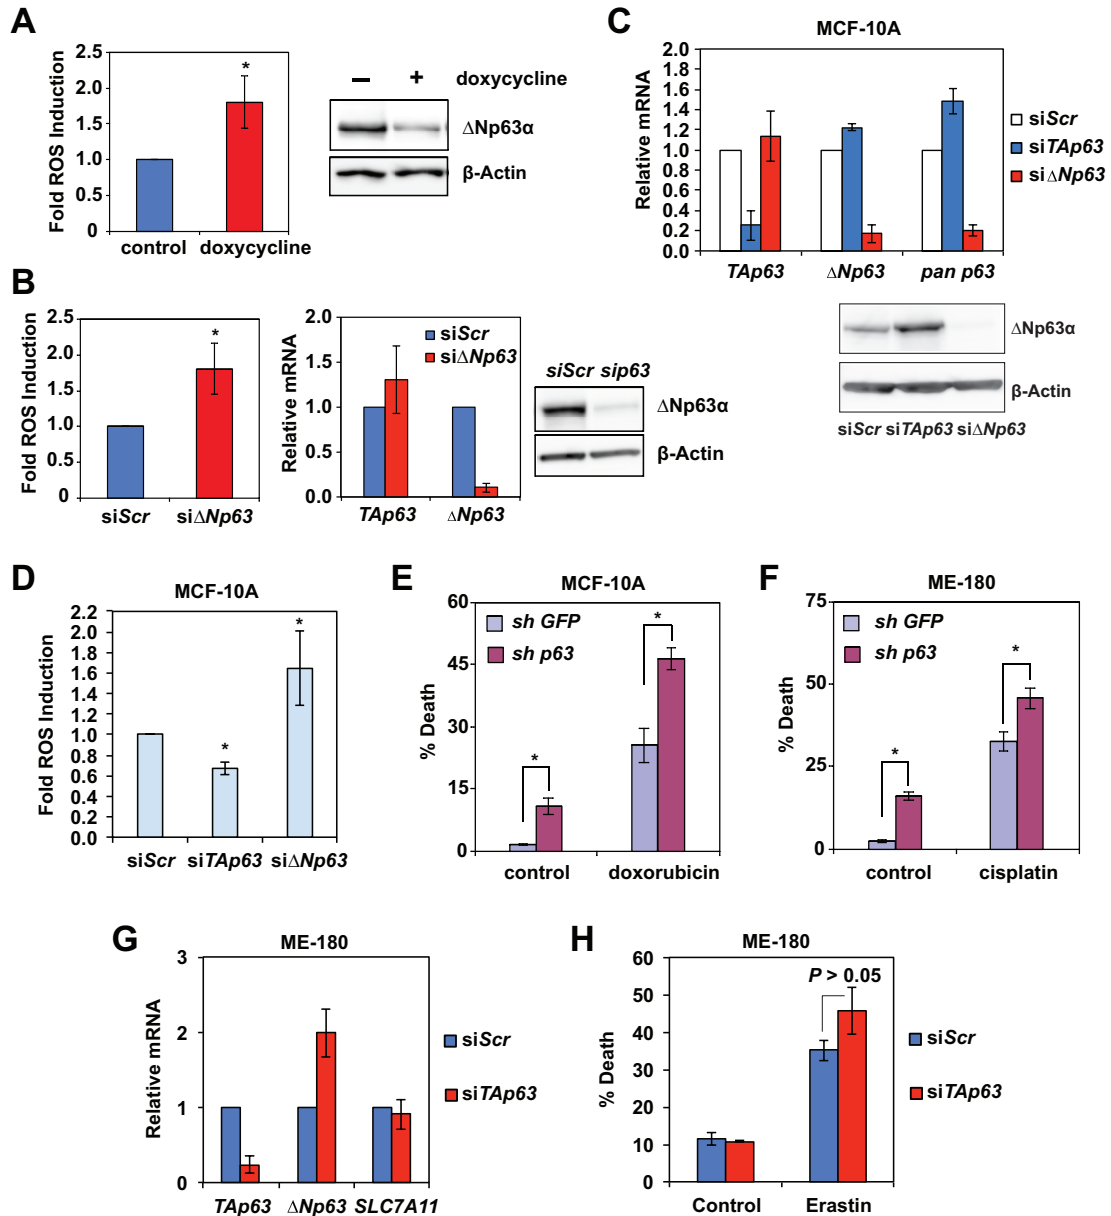

**Supplemental Figure S5. Knockdown of  $\Delta$ Np63 $\alpha$  but not TAp63 induces ROS accumulation and sensitizes cells to chemotherapeutic agent-induced cell death.**

(A) ME-180 cells were transduced with lentivirus expressing doxycycline-inducible miR30-based shRNA against all p63 isoforms. Cells were untreated or treated with doxycycline (2  $\mu$ g/ml) for three days and analyzed for ROS production and immunoblots using the indicated antibodies. Oxidation of the ROS-sensitive dye H<sub>2</sub>DCFDA was quantified by flow cytometric analysis. Data shown are fold increase of ROS induced by knockdown of p63 (mean  $\pm$  s.d., n = 3). (B) ME-180 cells transfected with scrambled

siRNA (siScr) or siRNA against  $\Delta Np63$  for 3 days were subjected to analysis for ROS production or immunoblot analysis using the indicated antibodies. Oxidation of the ROS-sensitive dye H<sub>2</sub>DCFDA was quantified by flow cytometric analysis. Data shown are fold increase of ROS induced by knockdown of  $\Delta Np63$  (mean  $\pm$  s.d., n = 3). (C) MCF-10A cells, transfected with scrambled siRNA or siRNA against *TAp63* or  $\Delta Np63$ , were subjected to qRT-PCR analysis for the indicated p63 isoform as well as immunoblot analysis using the indicated antibodies. qRT-PCR data were normalized against GAPDH (mean  $\pm$  s.d., n = 3). (D) MCF-10A cells, transfected with scrambled siRNA or siRNA against *TAp63* or  $\Delta Np63$ , were subjected to CM-H<sub>2</sub>DCFDA staining followed by flow cytometric analysis. Data shown are fold increase of ROS induced by knockdown of *TAp63* or  $\Delta Np63$  (mean  $\pm$  s.d., n = 3). (E) MCF-10A cells transduced with lentivirus expressing shRNA against GFP or p63 for 48 hours were untreated or treated with doxorubicin (1  $\mu$ g/ml) for 27 hours. Cell death was quantified by propidium iodide (PI) staining (mean  $\pm$  s.d., n = 3). (F) ME-180 cells transduced with lentivirus expressing shRNA against GFP or p63 for 48 hours were mock treated or treated with cisplatin (10  $\mu$ M) for 32 hours. Cell death was quantified by propidium iodide (PI) staining (mean  $\pm$  s.d., n = 3). (G) ME-180 cells, transfected with scrambled siRNA or siRNA against *TAp63*, were subjected to qRT-PCR analysis of *TAp63*,  $\Delta Np63$ , and *SLC7A11* mRNA. Data were normalized against GAPDH (mean  $\pm$  s.d., n = 3). (H) ME-180 cells, transfected with scrambled siRNA or siRNA against *TAp63*, were mock treated or treated with erastin (20  $\mu$ M) for 72 h. Cell death was quantified by propidium iodide staining (mean  $\pm$  s.d., n = 3). \*,  $P < 0.05$ .

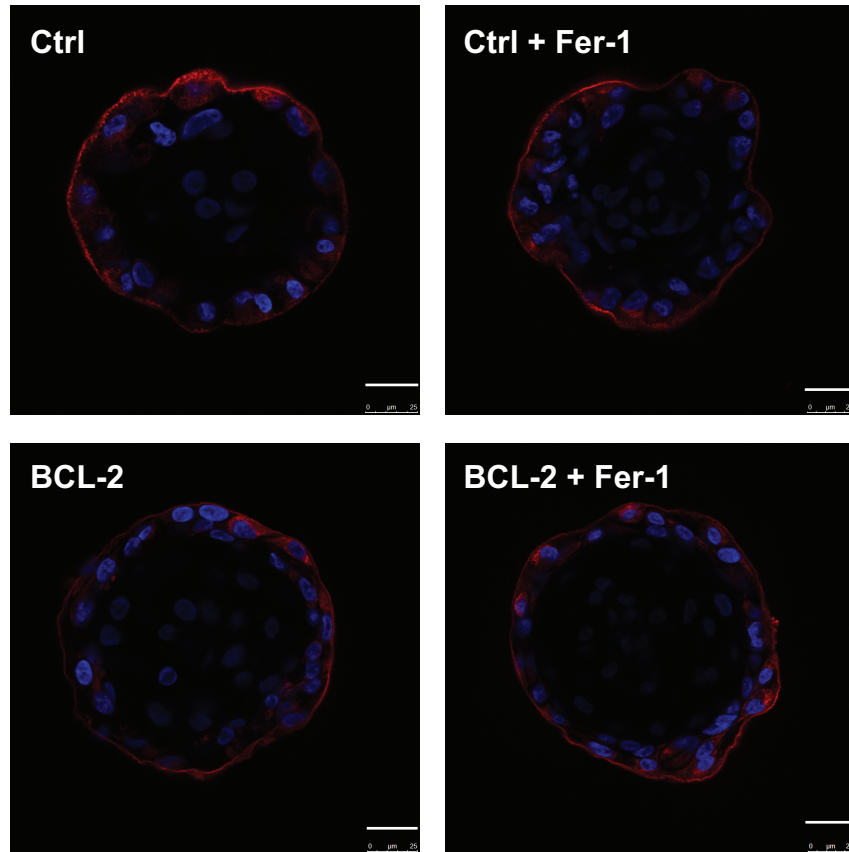

**Supplemental Figure S6. Ferrostatin-1 has minimal effect on the luminal clearance of mammary acini in three-dimensional culture.** MCF-10A cells transduced with retrovirus expressing GFP or BCL-2 were cultured in reconstituted basement membrane (Matrigel)  $\pm$  ferrostatin-1 for 28 days. Acini were fixed and stained for Laminin 5 (red) and nuclear stain DAPI (blue). Representative confocal microscopy images from two independent experiments are shown. Scale bar, 25  $\mu$ m.



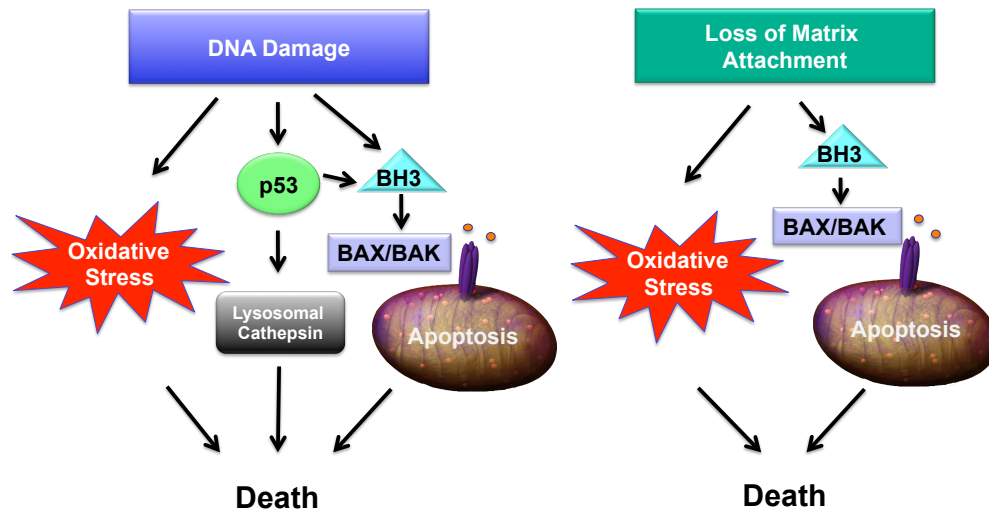

**Intrinsic Death Signals Induce both BAX/BAK-Dependent Apoptosis and BAX/BAK-Independent Oxidative Stress**

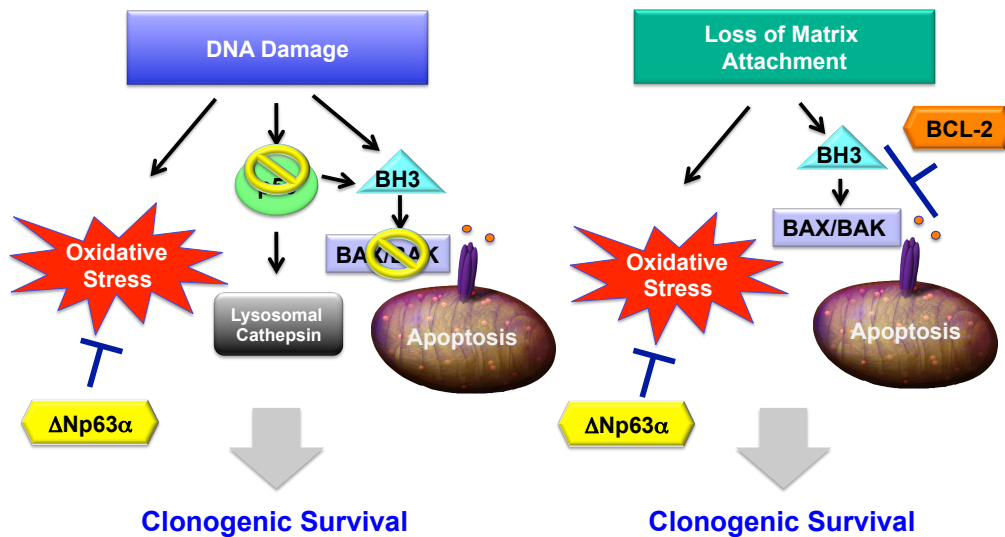

**Combined Inhibition of Apoptosis and Oxidative Stress Promotes Clonogenic Survival upon Intrinsic Death Signals**

**Supplemental Figure S7.** Model depicts the apoptotic and non-apoptotic cell death pathways activated by DNA damage and loss of matrix attachment, respectively.

| <b>Gene</b>          | <b>Cat#</b>           | <b>Sequences</b>         |
|----------------------|-----------------------|--------------------------|
| mouse <i>Idh2</i> #1 | Ambion s114463        | 5'-AGACUGACUUCGACAGGAAtt |
| mouse <i>Idh2</i> #2 | Ambion 95489          | 5'-GGAUAAGAUCUGGUAUGAtt  |
| mouse <i>Gclc</i> #1 | Ambion s66718         | 5'-CGGUAUGACUCAAUAGAUAtt |
| mouse <i>Gclc</i> #2 | Ambion s201400        | 5'-GGGUGAUCCUCUCAUCAAtt  |
| mouse <i>Gss</i> #1  | Ambion s67110         | 5'-GCCCAGUCAGUAUAAUUCAtt |
| mouse <i>Gss</i> #2  | Ambion s67112         | 5'-CCAUCAAAAAGGACGACUAtt |
| mouse <i>Gpx2</i> #1 | Dharmacon siGenome-02 | 5'-UCAAUGAGCUGCAAUGUCG   |
| mouse <i>Gpx2</i> #2 | Dharmacon siGenome-03 | 5'-CAACUACCCGGGACUACAA   |
| mouse <i>Nrf2</i>    | Ambion s70523         | 5'-CAUUUUUACUCAUCGAUCUtt |
| mouse <i>p63</i>     | Dharmacon siGenome-04 | 5'-CCACCGAACUGAAGAAGCU   |
| human $\Delta Np63$  | Dharmacon siGenome-08 | 5'-CGACAGUCUUGUACAAUUU   |
| human <i>TAp63</i>   | Dharmacon siGenome-06 | 5'-CAAACAAGAUUGAGAUUAG   |
| mouse <i>Rip1</i> #1 | Ambion s72975         | 5'-GGUGGUACCCUUUACUACAtt |
| mouse <i>Rip1</i> #2 | Ambion s72977         | 5'-GGAUUUGGAACUACAGGUAtt |

**Table S1.** Summary of siRNA oligos.

| <b>Gene</b>                 | <b>Sequences of Primers for qRT-PCR</b> |
|-----------------------------|-----------------------------------------|
| mouse p63 pan-isoform       | 5'-CCTTTCCGTCAGAATACACACGGA-3'          |
| mouse p63 pan-isoform       | 5'-GTTTCTGAAGTAGGTGCTGGTGCT-3'          |
| mouse <i>TAp63</i> isoform  | 5'-CCTATATGCTCAGTACAGCCCATCG-3'         |
| mouse <i>TAp63</i> isoform  | 5'-CTATTCTGTGCGTGGTCTGTGTTGT-3'         |
| mouse $\Delta Np63$ isoform | 5'-TCTTAGAAGATTCGCAGCGCAAGG-3'          |
| mouse $\Delta Np63$ isoform | 5'-CTATTCTGTGCGTGGTCTGTGTTGT-3'         |
| mouse <i>Gclc</i>           | 5'-TACACCTGGATGATGCCAACGA-3'            |
| mouse <i>Gclc</i>           | 5'-GTCAACCTTGGACAGCGGAATG-3'            |
| mouse <i>Gss</i>            | 5'-CCTGATGCTAGAGAGATCTCGTGC-3'          |
| mouse <i>Gss</i>            | 5'-CTCTCTCCTCACTGTCCTTCAGC-3'           |
| mouse <i>Idh2</i>           | 5'-CCTGATGACATCTGTGCTGGTCT-3'           |
| mouse <i>Idh2</i>           | 5'-GAGCTCTGTCCAGGTTGCTCTT-3'            |
| mouse <i>Nrf2 (Nfe2l2)</i>  | 5'-ATCCAGACAGACACCAGTGGATC-3'           |
| mouse <i>Nrf2 (Nfe2l2)</i>  | 5'-CAAACCTTGCTCCATGTCCTGCTC-3'          |
| mouse <i>Slc7a11</i>        | 5'-GTGGTGTGTTTCGCTGTCTCCA-3'            |
| mouse <i>Slc7a11</i>        | 5'-CGGAGAAGAGCATCACCATCGTC-3'           |
| human p63 pan-isoform       | 5'-AGAACGGTGATGGTACGAAGCG-3'            |
| human p63 pan-isoform       | 5'-GTA CTGCATGAGTTCCAGGGACTC-3'         |
| human <i>TAp63</i> isoform  | 5'-AAGATGGTGCGACAAACAAG-3'              |
| human <i>TAp63</i> isoform  | 5'-AGAGAGCATCGAAGGTGGAG-3'              |
| human $\Delta Np63$ isoform | 5'-GGAAAACAATGCCCAGACTC-3'              |
| human $\Delta Np63$ isoform | 5'-GTGGAATACGTCCAGGTGGC-3'              |
| human <i>GSS</i>            | 5'-GACCAGCGTGCCATAGAGAATGA-3'           |
| human <i>GSS</i>            | 5'-CATGTGACCTCTCCAGCAGTAGAC-3'          |
| human <i>IDH2</i>           | 5'-GATGGGAAGACGATTGAGGCTGA-3'           |
| human <i>IDH2</i>           | 5'-TCAGGAAGTGCTCGTTCAGCTT-3'            |
| human <i>GSR</i>            | 5'-CCAACGTCAAAGGCATCTATGCAG-3'          |
| human <i>GSR</i>            | 5'-ATCTCCGTGAGTCCCCTGTC-3'              |
| human <i>SLC7A11</i>        | 5'-GTTGCGTCTCGAGAGGGTCA-3'              |
| human <i>SLC7A11</i>        | 5'-GTCGAGGTCTCCAGAGAAGAGC-3'            |

**Table S2.** Summary of Primers for qRT-PCR.
